# Supplementary material for: Investigating the Antifungal Mechanism of Action of Polygodial by Phenotypic Screening in Saccharomyces cerevisiae
Source: MDPI journal article supplement (doi:10.3390/ijms22115756), 2021-05-28

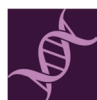

## Supplemental Tables and Figures

**Table S1:** Deletion strains sensitive (n=135) to polygodial ranked as 0 and 1. In bold are hypersensitive mutants (n=66). Gene functions and cellular locations were taken from the SGD database.

| Biological process                                          | Genes                                                                                                                             |
|-------------------------------------------------------------|-----------------------------------------------------------------------------------------------------------------------------------|
| Mitochondrial genome maintenance and normal morphology      | <i>GET1, PCP1, YME2</i>                                                                                                           |
| Mitochondria electron transport chain                       | <b><i>QCR10</i></b>                                                                                                               |
| Mitochondria ATPase                                         | <b><i>ATP2</i></b>                                                                                                                |
| Mitochondrial protein maturation                            | <b><i>ISA1</i></b>                                                                                                                |
| Mitochondrial import, folding, maturation, degradation      | <i>YME1</i>                                                                                                                       |
| Mitochondrial TCA cycle                                     | <i>KGD2</i>                                                                                                                       |
| Mitochondrial NADP biosynthesis                             | <i>POS5</i>                                                                                                                       |
| Mitochondrial riboflavin biosynthesis                       | <b><i>RIB4</i></b>                                                                                                                |
| Peroxisome protein deubiquitination                         | <b><i>UBP15</i></b>                                                                                                               |
| Vacuolar acidification, V-ATPase                            | <b><i>VMA1, VMA3, VMA4, VMA7, VMA8, VMA13, VMA16, VPH2</i></b>                                                                    |
| Vacuolar degradation autophagy                              | <i>ATG8, ATG12, ATG10, ATG13</i>                                                                                                  |
| Vesicular trafficking to vacuole, vacuolar protein sorting  | <b><i>VAM6, VAM3, GYP1, VAM7, VPS16, VPS54, VPS61, VPS63, VPS65</i></b>                                                           |
| Golgi P-type ATPase                                         | <b><i>PMR1</i></b>                                                                                                                |
| ER Golgi endosome trafficking                               | <i>CHS5, RGP1, YPT6, VPS35, VPS52, VPS54, SEC22, SEC28, YSP1</i>                                                                  |
| ER protein targeting to membrane, translocation             | <i>SEC66, SGT2, GET1, GET4</i>                                                                                                    |
| ER Golgi protein N-linked glycosylation                     | <b><i>OST4, OCH1</i></b>                                                                                                          |
| ER ergosterol biosynthesis                                  | <b><i>ERG3, ERG2, ERG28</i></b>                                                                                                   |
| ER sterol transport                                         | <b><i>SIP3</i></b>                                                                                                                |
| ER lipid droplet formation and triacylglyceride homeostasis | <i>VPS66/LOA1</i>                                                                                                                 |
| ER glycosylphosphatidylinositol biosynthesis                | <b><i>LAS21</i></b>                                                                                                               |
| ER-associated degradation (ERAD)                            | <b><i>SHP1</i></b>                                                                                                                |
| Nuclear envelope phospholipid biosynthesis, lipid droplets  | <i>NEM1</i>                                                                                                                       |
| Chromatin organization, structure, remodelling              | <i>EAF1, ULS1, RTF1, ARP5</i>                                                                                                     |
| Plasma membrane transport                                   | <b><i>FUR4, TRK1</i></b>                                                                                                          |
| Cell wall synthesis                                         | <i>SMI1, FKS1</i>                                                                                                                 |
| Bud site selection & axial budding                          | <b><i>BUD25</i></b>                                                                                                               |
| Cytoskeleton organization and cellular morphogenesis        | <i>BEM2</i>                                                                                                                       |
| Actin stabilization                                         | <b><i>TPM1</i></b>                                                                                                                |
| Transcription regulation                                    | <i>SWI3, TAF14, SSN3, GAL11, CSE2, SIP3, BUR2, GON7, ROX3, SRB2, SNF6, SNF12, SRB5, RTF1, ADA2, UME6, RPN4, MED2, TUP1, RPA14</i> |

|                                                      |                                                                                                      |
|------------------------------------------------------|------------------------------------------------------------------------------------------------------|
| Mitosis, meiosis                                     | <i>DCC1, CTF4, CNM67, VPS54, <b>HTL1, CIK1</b>, MRE11</i>                                            |
| mRNA export from nucleus                             | <i>SAC3, <b>NPL3</b></i>                                                                             |
| Nuclear protein import                               | <i><b>MOG1</b></i>                                                                                   |
| DNA repair                                           | <i>FYV6</i>                                                                                          |
| Amino acid synthesis                                 | <i><b>TYR1, CPA1, ADE3, PRO1, PRO2, SER1, SER2, TRP1, TRP2, TRP5, CPR2, ARG2</b></i>                 |
| Ribosomal protein; translation and protein synthesis | <i>RPL13B, <b>MRPL23, TIF3</b>, CPA1 <i>u</i>ORF</i>                                                 |
| Ribosome biogenesis                                  | <i>SAC3, BMT5</i>                                                                                    |
| Signal transduction                                  | <i>TPK1, <b>IRA2, PHO85</b>, CLA4, NBP2, STE11</i>                                                   |
| Glycolysis                                           | <i><b>PFK2</b>, ADH1</i>                                                                             |
| Glutathione biosynthesis, binding                    | <i><b>GSH1</b>, URE2</i>                                                                             |
| Cyanamide metabolism                                 | <i><b>DDI3</b></i>                                                                                   |
| Trehalose synthesis                                  | <i>TPS2</i>                                                                                          |
| Nucleotide metabolism                                | <i>ADE3, ADK1</i>                                                                                    |
| Intracellular copper transport                       | <i>CCS1</i>                                                                                          |
| Mating                                               | <i>SCP160</i>                                                                                        |
| Unknown function                                     | <i>ECM33, BOP2, JJJ2, YGL024W, YML012C-A, YER091C-A, YDR433W, YDR157W, YMR102C, YOR331C, YNL296W</i> |

**Table S2:** Mutants resistant to polygodial ranked as 5 and 6 (n=233). In bold are hyper-resistant mutants (n=47). Gene functions and cellular locations were taken from the SGD database.

| Biological process                                                      | Genes                                                                                                        |
|-------------------------------------------------------------------------|--------------------------------------------------------------------------------------------------------------|
| Mitochondrial transcription and translation                             | <i>PET494, MSK1, MEF1, MEF2, MTF2, MRM2, MRPL38, <b>MRPL35, SLS1, TUF1, MSE1, RSM27, MRX5</b></i>            |
| Mitochondrial genome maintenance, fusion, fission and normal morphology | <i><b>MCP2</b>, CCE1, RIM1, ACO1, <b>MGM1, DNM1</b>, UGO1</i>                                                |
| Mitochondria ATPase                                                     | <i>ATP15, <b>ATP17, AFG3</b></i>                                                                             |
| Mitochondrial inner membrane electron transport chain                   | <i><b>QCR9</b></i>                                                                                           |
| Mitochondrial protein folding                                           | <i>CPR3, MDJ1</i>                                                                                            |
| Mitochondrial TCA cycle                                                 | <i><b>FUM1</b>, PDX1, CIT1, SDH5, ACO1, ACO2</i>                                                             |
| Mitochondrial amino acid biosynthesis                                   | <i><b>GDH3, ALT1, THI4, AAT1</b></i>                                                                         |
| Mitochondrial transporter activity                                      | <i>MDL1, HOT13, FLX1, MRS2</i>                                                                               |
| Mitochondrial lipid homeostasis                                         | <i>UPS2, MCP2</i>                                                                                            |
| Mitochondrial unknown function                                          | <i>MRP8, FMP33, FMP48, FMP49</i>                                                                             |
| Peroxisome biogenesis                                                   | <i>PEX30</i>                                                                                                 |
| Vacuolar protein sorting, MVB, ESCRT, CORVET                            | <i>SNA3, MIL1, CPS1, YCK3, <b>VPS8, VPS9</b>, VPS21, VPS36, VPS60, VPS25, VPS27, MVB12, SSH4, LST4, ENV7</i> |
| Vacuolar transport                                                      | <i>AVT3, <b>BPT1</b>, CCC1</i>                                                                               |
| Vacuolar carboxypeptidases                                              | <i>ATG42, CPS1</i>                                                                                           |
| Golgi glycosylation                                                     | <i><b>MNN4</b></i>                                                                                           |
| ER Golgi transport                                                      | <i>COY1</i>                                                                                                  |

|                                                                 |                                                                                                                                                                                                                                                                                                                                                                                                                                                                 |
|-----------------------------------------------------------------|-----------------------------------------------------------------------------------------------------------------------------------------------------------------------------------------------------------------------------------------------------------------------------------------------------------------------------------------------------------------------------------------------------------------------------------------------------------------|
| ER enzymes and transport                                        | <i>ICE2, ERV2, YBR137W</i>                                                                                                                                                                                                                                                                                                                                                                                                                                      |
| ER cargo exit                                                   | <i>TED1</i>                                                                                                                                                                                                                                                                                                                                                                                                                                                     |
| ER lipid homeostasis                                            | <i>OSH2, APQ12</i>                                                                                                                                                                                                                                                                                                                                                                                                                                              |
| ER inheritance                                                  | <i>SHE3</i>                                                                                                                                                                                                                                                                                                                                                                                                                                                     |
| Actin cytoskeleton reorganization, microtubules and endocytosis | <i>RVS167, RVS161, SLA1, END3, ACF2, SRV2, GVP36, TPM2, PAC11, CIN1</i>                                                                                                                                                                                                                                                                                                                                                                                         |
| Plasma membrane transport                                       | <i>QDR1, AQR1, HXT10, ALR2, FRE7, BOR1, AMF1,</i>                                                                                                                                                                                                                                                                                                                                                                                                               |
| Cell wall                                                       | <i>FIT3, KDX1, PRY3, TOS1</i>                                                                                                                                                                                                                                                                                                                                                                                                                                   |
| Bud site selection & axial budding                              | <i>BUD2, <b>BUD20</b>, BUD21, BUD26, BUD28, AXL2</i>                                                                                                                                                                                                                                                                                                                                                                                                            |
| Mating                                                          | <i>FUS3, KDX1, PRY3</i>                                                                                                                                                                                                                                                                                                                                                                                                                                         |
| Mitosis and Meiosis                                             | <i>HOP1, CLG1, IRC8, RMR1, HOS4, REC8, SMA2, GMC1</i>                                                                                                                                                                                                                                                                                                                                                                                                           |
| Nuclear protein, protein quality control                        | <i>CMR1</i>                                                                                                                                                                                                                                                                                                                                                                                                                                                     |
| DNA repair and excision                                         | <i>RAD7, RAD16, EAF7, MMS4, REV7, UBC13, YNK1</i>                                                                                                                                                                                                                                                                                                                                                                                                               |
| Transcription regulators                                        | <i>MSS11, TEA1, RFX1, MRK1, <b>HAP4</b>, CSI1, URC2, SPT7, HAA1, <b>EAF7</b>, <b>HAP2</b>, NOT3, <b>HAP5</b>, YAP7, TYE7, ACM1, HOS2, LAG2</i>                                                                                                                                                                                                                                                                                                                  |
| RNA processing                                                  | <i>NNF2, MUD1, CAF40, PES4</i>                                                                                                                                                                                                                                                                                                                                                                                                                                  |
| Ribosomal protein; translation and protein synthesis            | <i>RPP2A, RPL24B, <b>RPL37A</b>, <b>RPS28B</b>, RPL29, RPL24A, RPL23A, RPL23B, RPL16A, RPL41B, <b>RPL13A</b>, <b>RPS16B</b>, RPS17B, RPS16A, RPL27B, RPL19A, RPS25A, <b>RPL1B</b>, RPS30A, RPS1B</i>                                                                                                                                                                                                                                                            |
| Ribosome biogenesis                                             | <i>SYO1, NOP12, GVP36</i>                                                                                                                                                                                                                                                                                                                                                                                                                                       |
| Signal transduction, GSE/EGO complex                            | <i><b>MDS3</b>, <b>GTR1</b>, <b>GTR2</b>, LTV1, PIB2, <b>CKA2</b>, RCN1, CNB1, <b>SIP5</b>, GIS4</i>                                                                                                                                                                                                                                                                                                                                                            |
| Ubiquitination & proteasome complex activity                    | <i><b>UBI4</b>, <b>UBR2</b>, <b>UBC13</b>, PRE9, MMS2, <b>MUB1</b>, <b>NPL4</b>, UBR1, HUL5, ELA1</i>                                                                                                                                                                                                                                                                                                                                                           |
| Nucleotide biosynthesis                                         | <i>YNK1, URA4, AMD1</i>                                                                                                                                                                                                                                                                                                                                                                                                                                         |
| Cytoplasmic L-methionine salvage                                | <i>UTR4</i>                                                                                                                                                                                                                                                                                                                                                                                                                                                     |
| Glycogen biosynthesis, glycolysis and gluconeogenesis           | <i><b>TDH3</b>, GSY2</i>                                                                                                                                                                                                                                                                                                                                                                                                                                        |
| Glycerol metabolism                                             | <i>GPD2</i>                                                                                                                                                                                                                                                                                                                                                                                                                                                     |
| NADH-dependent aldehyde reductase                               | <i>YNL134C</i>                                                                                                                                                                                                                                                                                                                                                                                                                                                  |
| NAD biosynthesis                                                | <i>YEF1</i>                                                                                                                                                                                                                                                                                                                                                                                                                                                     |
| Undefined/ unclear/unknown                                      | <i><b>IRC19</b>, OCA4, <b>OCA5</b>, GDS1, FHN1, STB6, NQM1, PBP4, FMP33, FMP48, BSC4, CMR3, CMG1, SDD2, YPR078C, YOR333C, YOL079W, YOR309C, YNR005C, YML084W, YMR141C, YML083C, YKL147W, YLR407W, YLR169W, YLR125W, YLR184W, YLL047W, YKL075C, YJR056C, YIL161W, YJL028W, YIL141W, YGR219W, YGR137W, YGR122C-A, YFL032W, YFL015C, YER038W-A, YDR442W, YBR013C, YDL094C, YDL062W, YBR287W, YML095C-A, YBR144C, YBR138C, YJL017W, YJL206C-A, YBR096W, YGR153W</i> |

**Figure S1:** An example of a read-out from the chemogenomic screen. The same mutant strains from a 96-well plate were spotted on these three agar plates. The top agar plate contains DMSO (diluent of polygodial) and is a control plate. The middle agar plate contains 2  $\mu\text{g/mL}$  polygodial (to detect hypersensitive strains) while the bottom plate contains 6  $\mu\text{g/mL}$  polygodial (to detect resistant strains). Ranking was based on the growth of the mutants relative to the WT BY4742. Lower ranks (0-2) represent poor growth, 3 represents WT and more growth than WT ranks from 4-6.

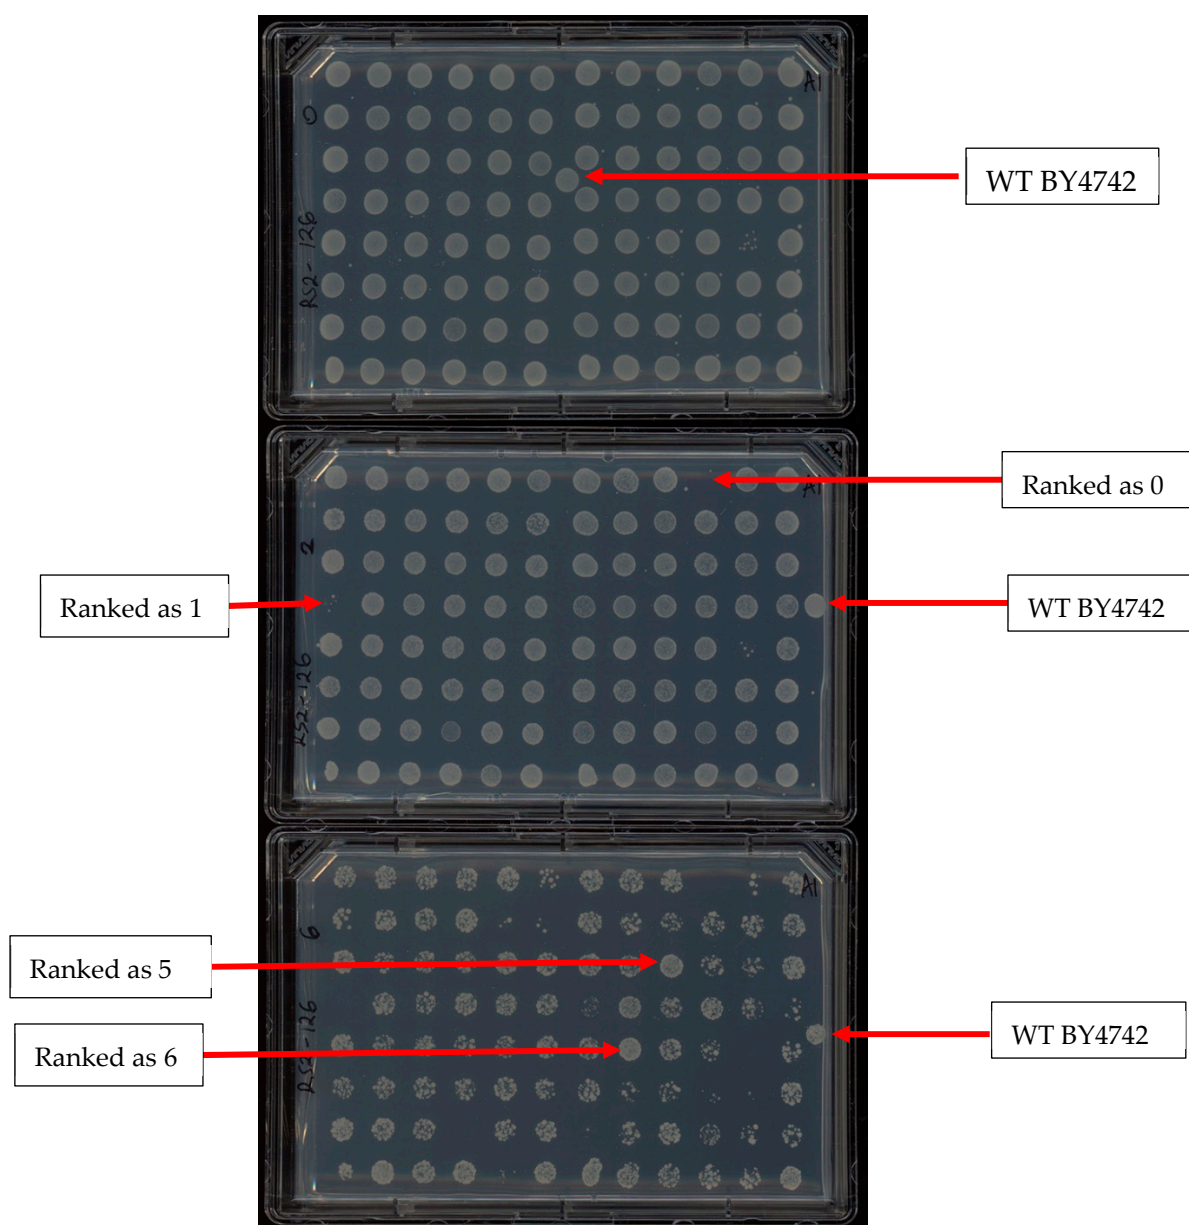

**Figure S2:** A clustering visualization of all polygodial sensitive strains using the STRING database. The colored circular nodes represent proteins, while the edges joining the nodes represent interactions (protein-protein), either established known interactions or predicted interactions.

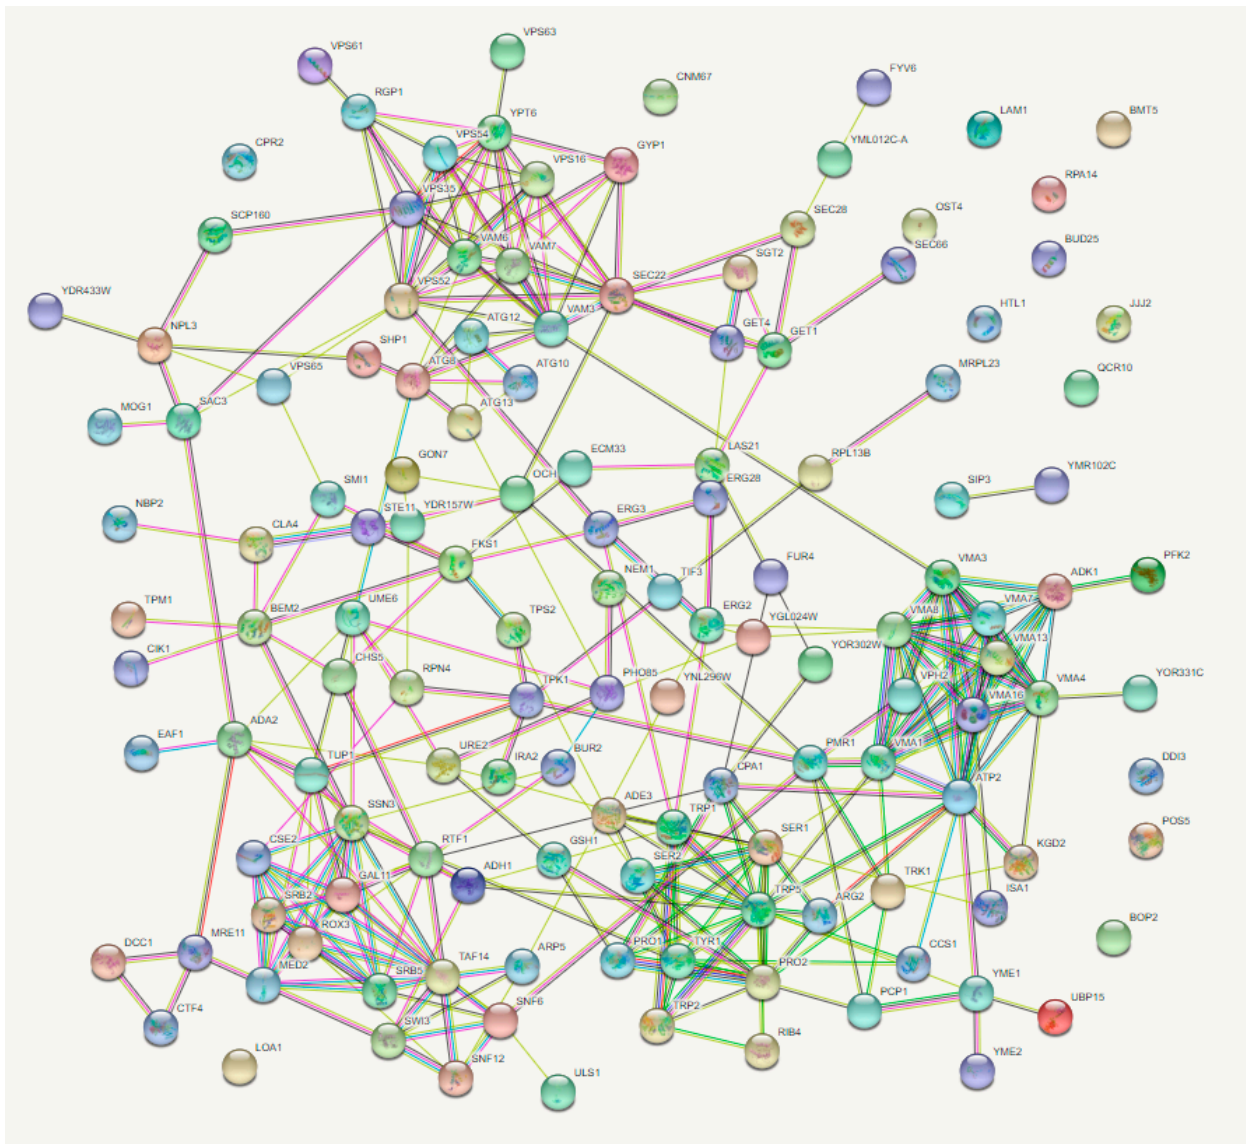



**Figure S3:** A clustering visualization of all polygodial resistant strains using the STRING database. The colored circular nodes represent proteins, while the edges joining the nodes represent interactions (protein-protein), either established known interactions or predicted interactions.

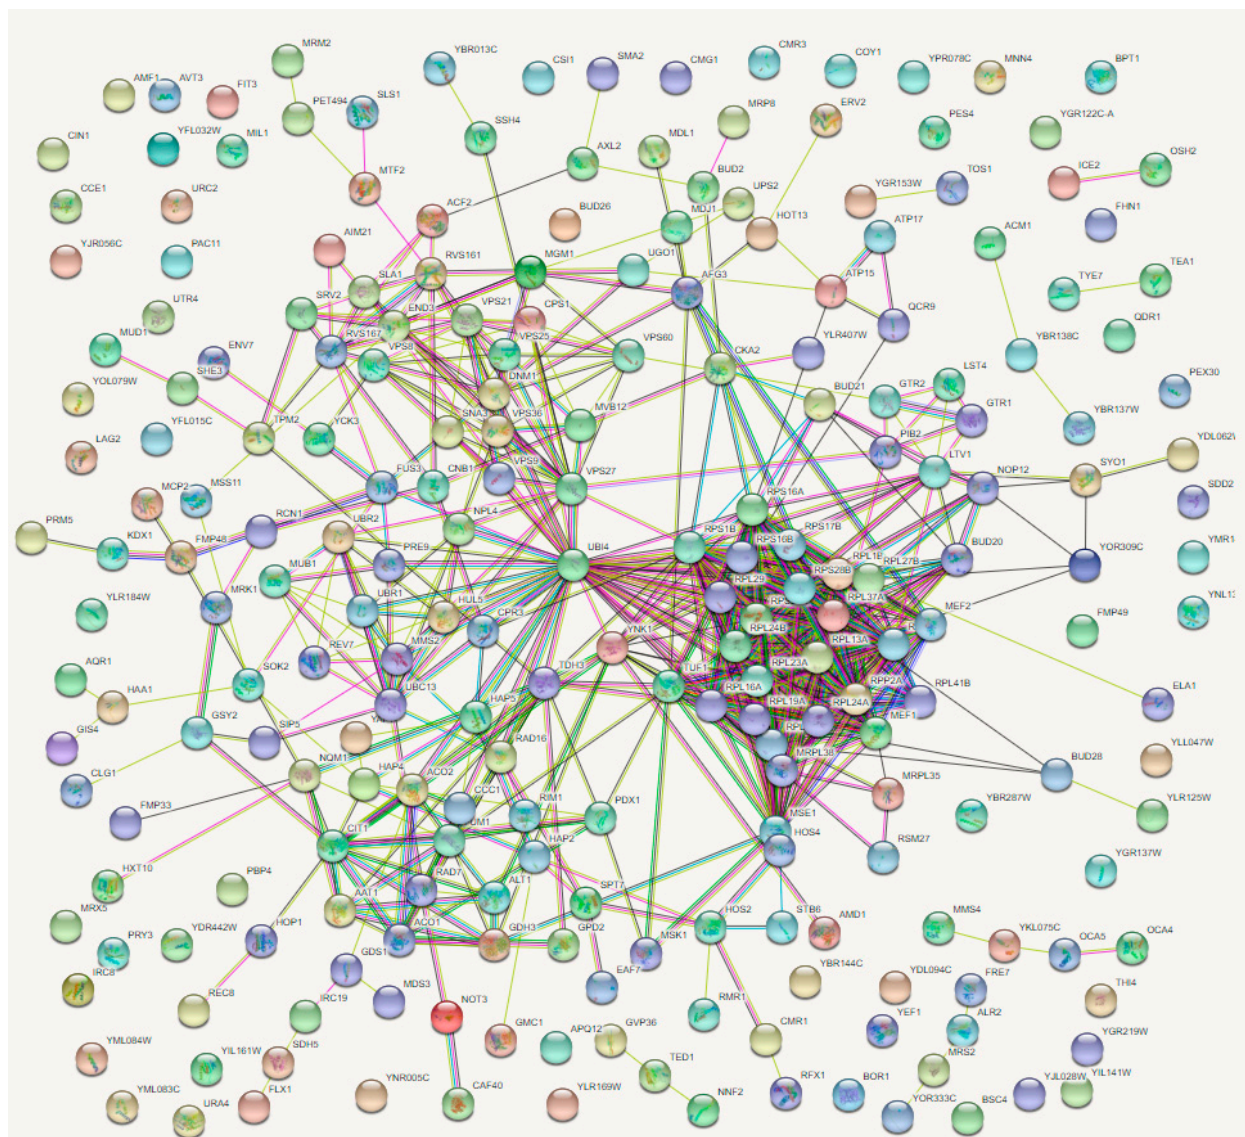

Supplement: s1 [file s1]
